# Supplementary material for: SIn2Te/TeIn2Se: a type-II heterojunction as a water-splitting photocatalyst with high solar energy harvesting
Source: Royal Society of Chemistry journal article supplement (doi:10.1039/d1tc01278a), 2021-01-01
Supplement: d1tc01278a1.pdf [file d1tc01278a1.pdf]

## Supplementary Information:

# SIn<sub>2</sub>Te/TeIn<sub>2</sub>Se: a type-II heterojunction as water-splitting photocatalyst with high solar energy harvesting

Peishun Shan<sup>1</sup>, Chunxiao Zhang<sup>1,2</sup>, Mengshi Zhou<sup>1</sup>, Chaoyu He<sup>1,2</sup>, Tao Ouyang<sup>1,2</sup>, Jin Li<sup>1,2</sup>, Chao Tang<sup>1</sup> and Jianxin Zhong<sup>1</sup>

<sup>1</sup>Hunan Key Laboratory for Micro-Nano Energy Materials and Devices, Laboratory for Quantum Engineering and Micro-NanoEnergy Technology, School of Physics and Optoelectronics, Xiangtan University, Hunan 411105, People's Republic of China

<sup>2</sup>Department of optoelectronic information science and technology, School of Physics and Optoelectronics, Xiangtan University, Hunan 411105, People's Republic of China

---

\* Corresponding authors. Tel +86 731 58292195 E-mail: [zhangchunxiao@xtu.edu.cn](mailto:zhangchunxiao@xtu.edu.cn) (C. Zhang)

\*\* Corresponding authors. Tel +86 731 58292437 E-mail: [tang\\_chao@xtu.edu.cn](mailto:tang_chao@xtu.edu.cn) (C. Tang)

**Table S1** In-Plane lattice constant (a) and bond lengths of M-M, M-X, M-Te for M<sub>2</sub>XTe (in Å), bandgap E<sub>g</sub> (eV).

| material | a     | M-M   | M-X   | M-Te  | $E_g(\text{PBE})$ | $E_g(\text{HSE06})$ |
|----------|-------|-------|-------|-------|-------------------|---------------------|
| SeGa2Te  | 3.985 | 2.471 | 2.552 | 2.665 | 1.22              | 1.92                |
| SGa2Te   | 3.900 | 2.472 | 2.449 | 2.643 | 0.90              | 1.57                |
| SeIn2Te  | 4.244 | 2.814 | 2.729 | 2.857 | 1.15              | 1.80                |
| SIn2Te   | 4.166 | 2.815 | 2.624 | 2.839 | 0.90              | 1.53                |

**Table S2** The calculated binding energy( $E_b$ ) of the M2XTe heterostructures with different stacking.

| System<br>(Lattice mismatch) | Stacking<br>(types) | $E_b$<br>(eV) | System<br>(Lattice mismatch) | Stacking<br>(types) | $E_b$<br>(eV) |
|------------------------------|---------------------|---------------|------------------------------|---------------------|---------------|
| SeIn2Te/SeGa2Te<br>(6.10%)   | AA                  | -0.1023       | SIn2Te/SeIn2Te<br>(1.88%)    | AA                  | -0.1636       |
|                              | AB-Te-Ga            | -0.2023       |                              | AB-Te-In            | -0.2838       |
|                              | AB-In-Se            | -0.2136       |                              | AB-In-Se            | -0.2876       |
| TeIn2Se/TeGa2Se              | AA                  | -0.1049       | TeIn2S/SeIn2Te               | AA                  | -0.1266       |
|                              | AB-Se-Ga            | -0.2162       |                              | AB-S-In             | -0.2418       |
|                              | AB-In-Te            | -0.2191       |                              | AB-In-Se            | -0.2483       |
| TeIn2Se/SeGa2Te              | AA                  | -0.0824       | TeIn2S/TeIn2Se               | AA                  | -0.1469       |
|                              | AB-In-Se            | -0.1875       |                              | AB-S-In             | -0.2659       |
|                              | AB-Se-Ga            | -0.1817       |                              | AB-In-Te            | -0.2650       |
| SeIn2Te/TeGa2Se              | AA                  | -0.1225       | SIn2Te/TeIn2Se               | AA                  | -0.1809       |
|                              | AB-In-Te            | -0.2518       |                              | AB-Te-In            | -0.3161       |
|                              | AB-Te-Ga            | -0.2429       |                              | AB-In-Te            | -0.3173       |
| SGa2Te/SeGa2Te<br>(2.13%)    | AA                  | -0.1327       | SIn2Te/SeGa2Te<br>(4.32%)    | AA                  | -0.1296       |
|                              | AB-Te-Ga            | -0.2269       |                              | AB-Te-Ga            | -0.2268       |
|                              | AB-Ga-Se            | -0.2324       |                              | AB-In-Se            | -0.2392       |
| TeGa2S/SeGa2Te               | AA                  | -0.0949       | TeIn2S/SeGa2Te               | AA                  | -0.0932       |
|                              | AB-S-Ga             | -0.1736       |                              | AB-S-Ga             | -0.1874       |
|                              | AB-Ga-Se            | -0.1765       |                              | AB-In-Se            | -0.1970       |
| TeGa2S/TeGa2Se               | AA                  | -0.1159       | TeIn2S/TeGa2Se               | AA                  | -0.1153       |
|                              | AB-S-Ga             | -0.2035       |                              | AB-S-Ga             | -0.2200       |
|                              | AB-Ga-Te            | -0.1992       |                              | AB-In-Te            | -0.2239       |
| SGa2Te/TeGa2Se               | AA                  | -0.1523       | SIn2Te/TeGa2Se               | AA                  | -0.1513       |
|                              | AB-Te-Ga            | -0.2664       |                              | AB-Te-Ga            | -0.2690       |
|                              | AB-Ga-Te            | -0.2672       |                              | AB-In-Te            | -0.2777       |
| SGa2Te/SeIn2Te<br>(8.01%)    | AA                  | -0.0238       | SIn2Te/SGa2Te<br>(6.25%)     | AA                  | -0.0490       |
|                              | AB-Te-In            | -0.1342       |                              | AB-Te-Ga            | -0.1329       |
|                              | AB-Ga-Se            | -0.1318       |                              | AB-In-S             | -0.1434       |
| TeGa2S/SeIn2Te               | AA                  | -0.0176       | TeIn2S/SGa2Te                | AA                  | -0.0131       |
|                              | AB-S-In             | -0.0723       |                              | AB-S-Ga             | -0.0995       |

|                                          |          |         |                                         |         |         |
|------------------------------------------|----------|---------|-----------------------------------------|---------|---------|
|                                          | AB-Ga-Se | -0.0723 | AB-In-S                                 | -0.1031 |         |
| TeGa <sub>2</sub> S/TeIn <sub>2</sub> Se | AA       | -0.0018 | TeIn <sub>2</sub> S/TeGa <sub>2</sub> S | AA      | -0.0518 |
|                                          | AB-S-In  | -0.0987 | AB-S-Ga                                 | -0.1543 |         |
|                                          | AB-Ga-Te | -0.0891 | AB-In-Te                                | -0.1549 |         |
| SGa <sub>2</sub> Te/TeIn <sub>2</sub> Se | AA       | -0.0400 | SIn <sub>2</sub> Te/TeGa <sub>2</sub> S | AA      | -0.0887 |
|                                          | AB-Te-In | -0.1696 | AB-Te-Ga                                | -0.2055 |         |
|                                          | AB-Ga-Te | -0.1617 | AB-In-Te                                | -0.2140 |         |

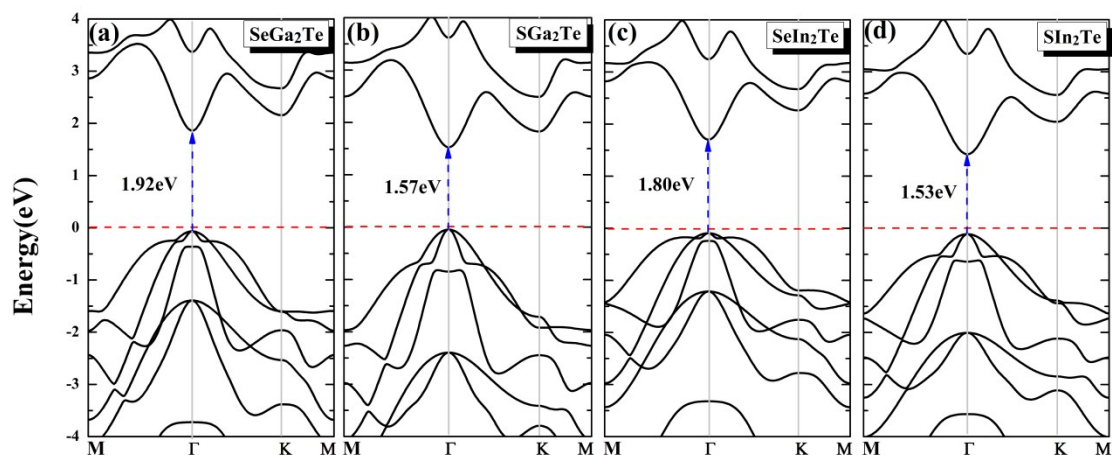

**Fig. S1** Band structure of single-layer (a) SeGa<sub>2</sub>Te, (b) SGa<sub>2</sub>Te, (c) SeIn<sub>2</sub>Te, (d) SIn<sub>2</sub>Te in HSE06.

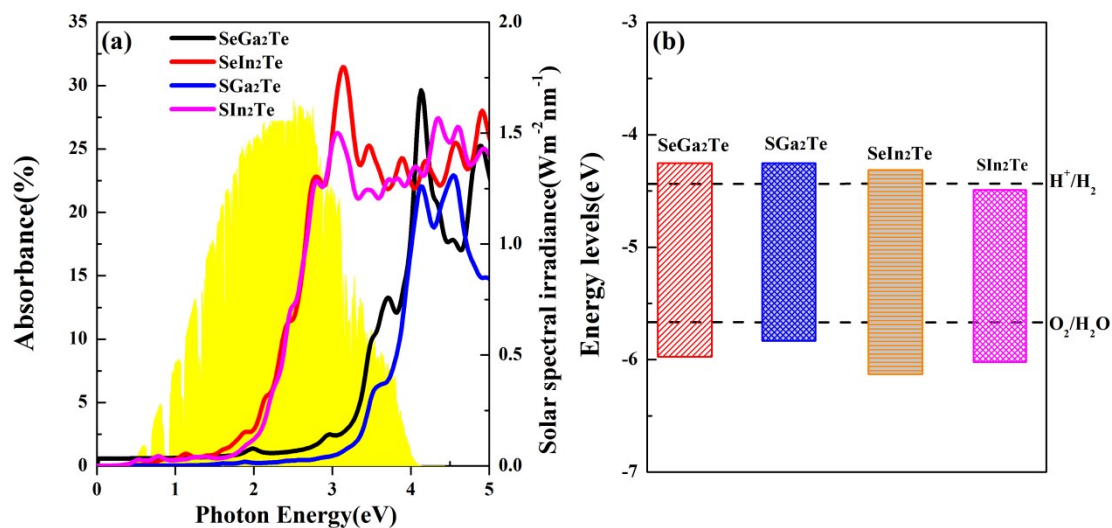

**Fig. S2** (a) Optical absorbance  $A(E)$  of Janus SeGa<sub>2</sub>Te, SeIn<sub>2</sub>Te, SGa<sub>2</sub>Te and SIn<sub>2</sub>Te, respectively. (b) The band edge alignment of the redox potential of Janus SeGa<sub>2</sub>Te, SeIn<sub>2</sub>Te, SGa<sub>2</sub>Te and SIn<sub>2</sub>Te relative to water calculated by the HSE06 method. The

black dotted line indicates the redox potential of water. The reference air-mass 1.5-solar-spectral irradiance is plotted in yellow.

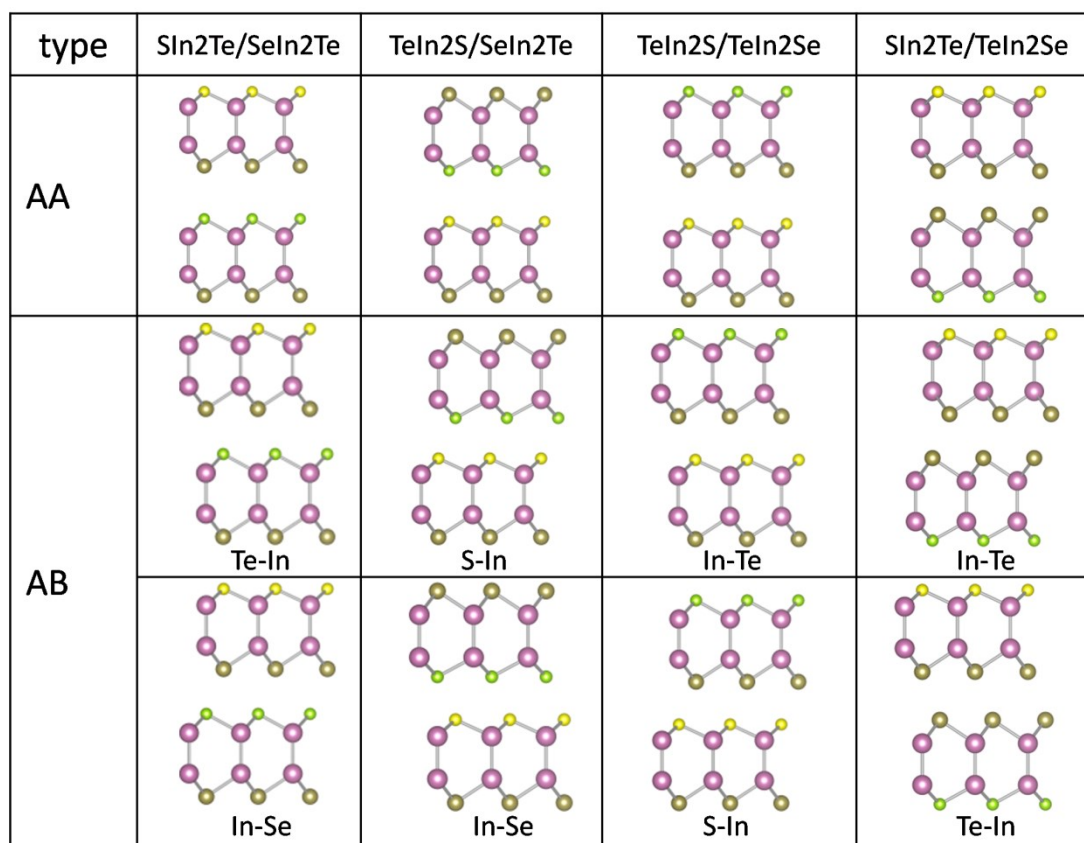

**Fig. S3** Various stacking configurations of SIn<sub>2</sub>Te/SeIn<sub>2</sub>Te heterojunction. In the naming format “AB-a1-a2”, the a1 and a2 stand for the opposite atoms at the interface. For example, the AB-In-Te means that the In atom from SIn<sub>2</sub>Te is directly above the Te atom from SeIn<sub>2</sub>Te in AB stacking SIn<sub>2</sub>Te/SeIn<sub>2</sub>Te. The XM<sub>2</sub>Te/XM<sub>2</sub>Te and XM<sub>2</sub>Te/TeM<sub>2</sub>X follow this stacking rule.

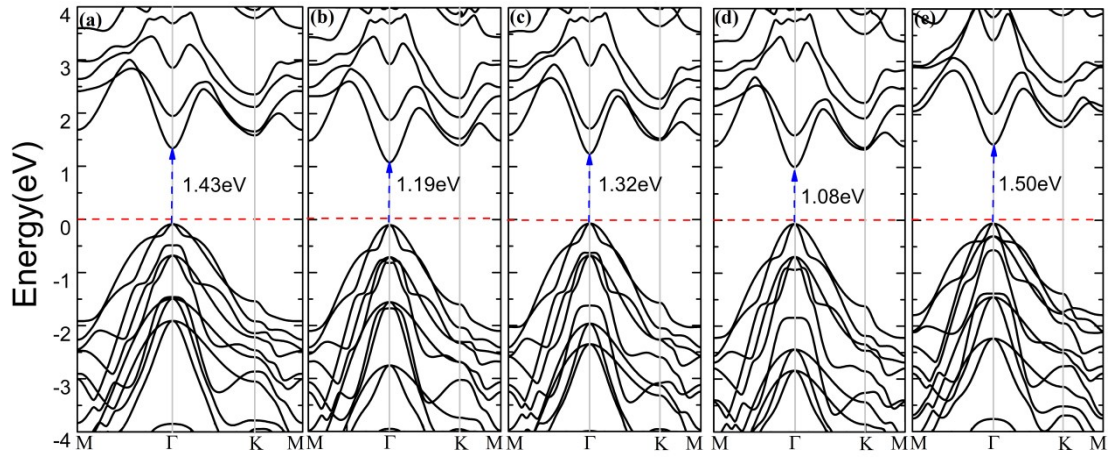

**Fig. S4** Band structures of vdW heterojunctions in their most stable stacking. (a) SeIn<sub>2</sub>Te/TeGa<sub>2</sub>Se, (b) SGa<sub>2</sub>Te/TeIn<sub>2</sub>Se, (c) SIn<sub>2</sub>Te/TeGa<sub>2</sub>Se, (d) SIn<sub>2</sub>Te/TeGa<sub>2</sub>S, (e) SIn<sub>2</sub>Te/TeIn<sub>2</sub>Se

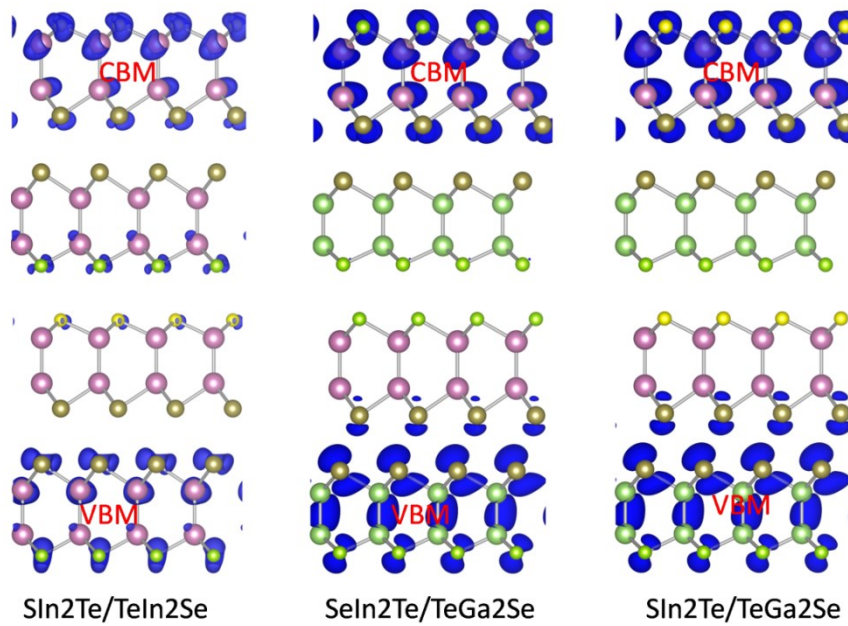

**Fig. S5** The band-decomposed charge density of the CBM and VBM of SIn<sub>2</sub>Te/TeIn<sub>2</sub>Se, SeIn<sub>2</sub>Te/TeGa<sub>2</sub>Se and SIn<sub>2</sub>Te/TeGa<sub>2</sub>Se, respectively. (The isosurface is 0.005 |e|Å<sup>3</sup>).

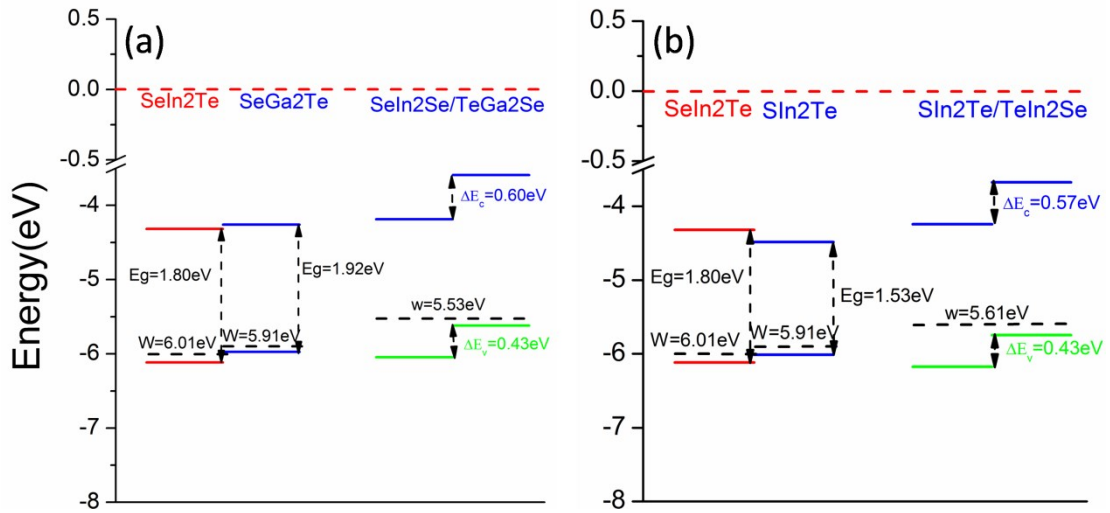

**Fig. S6** The band alignment of (a) SeIn<sub>2</sub>Te/TeGa<sub>2</sub>Se and (b) SIn<sub>2</sub>Te/TeIn<sub>2</sub>Se heterojunctions.

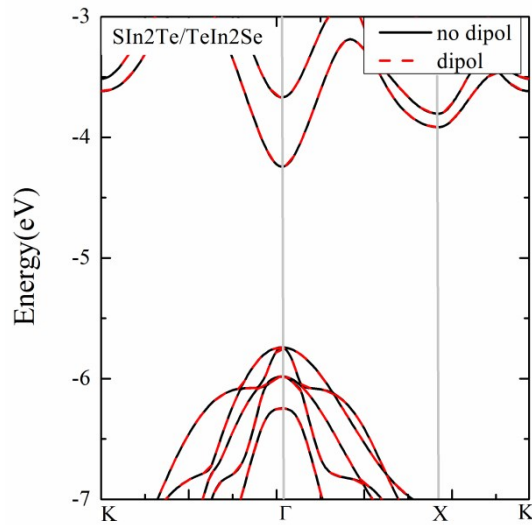

**Fig. S7** The band structure of SIn<sub>2</sub>Te/TeIn<sub>2</sub>Se heterojunction relative to vacuum energy level. (red and black lines with and without dipole correction, respectively)

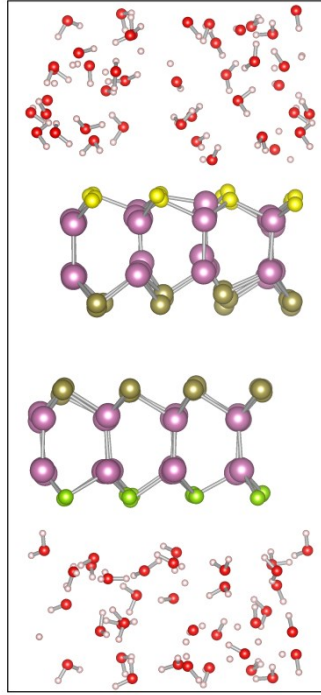

Fig. S8 Snapshot structure of SIn<sub>2</sub>Te/TeIn<sub>2</sub>Se heterojunction in liquid water after stabilizing at 500K for 6ps. (The simulation was carried out by placing the SIn<sub>2</sub>Te/TeIn<sub>2</sub>Se heterojunction in liquid water with a density of 1g/cm<sup>3</sup>)

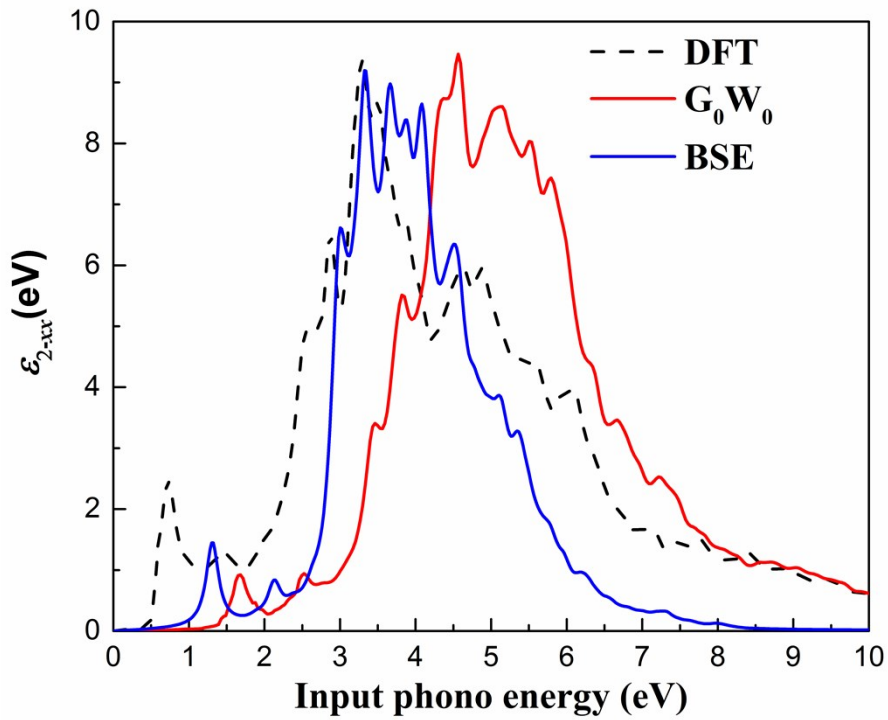

Fig. S9 Imaginary part of dielectric function of SIn<sub>2</sub>Te/TeIn<sub>2</sub>Se heterojunction

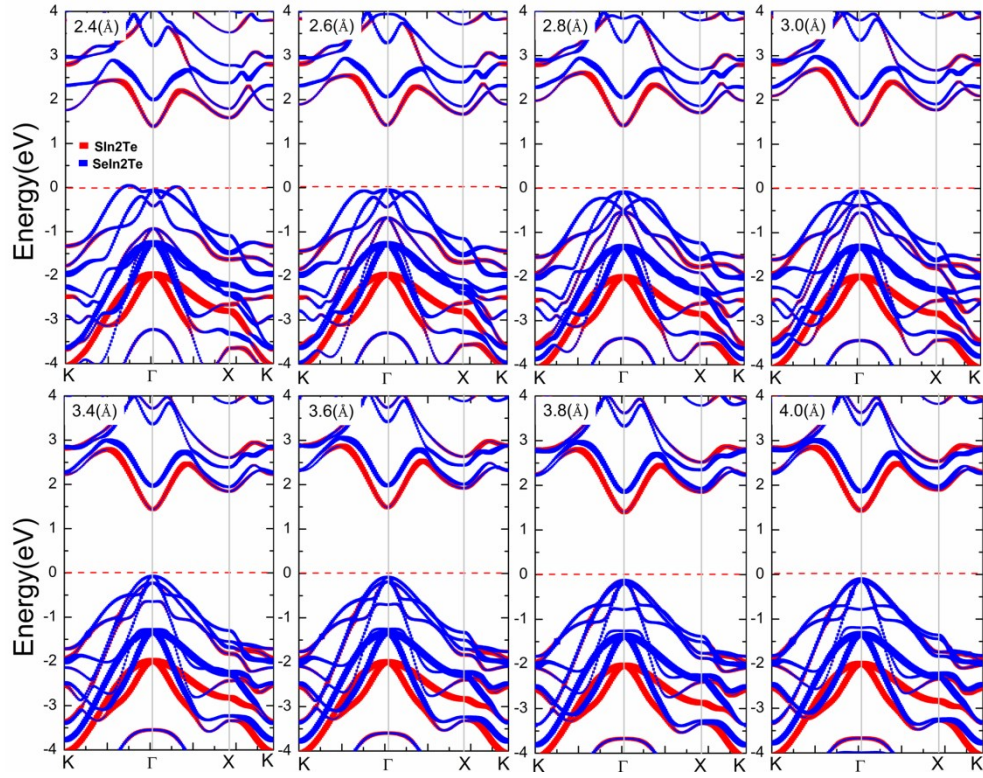

**Fig. S10** Projection band structure of Sn<sub>2</sub>Te/TeIn<sub>2</sub>Se as interlayer distance varies from 2.40 Å to 4.00 Å and the spacing is 0.2 Å.



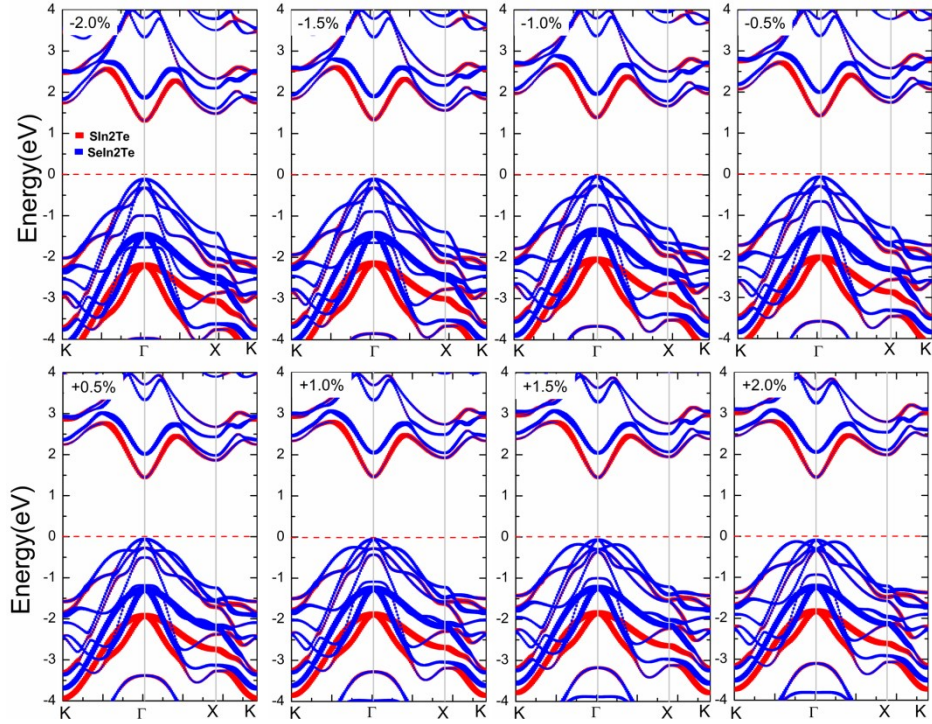

**Fig. S11** Projection band structure of the Sn<sub>2</sub>Te/TeIn<sub>2</sub>Se as biaxial strain increases from -2.0% to 2.0% with 0.5% interval.

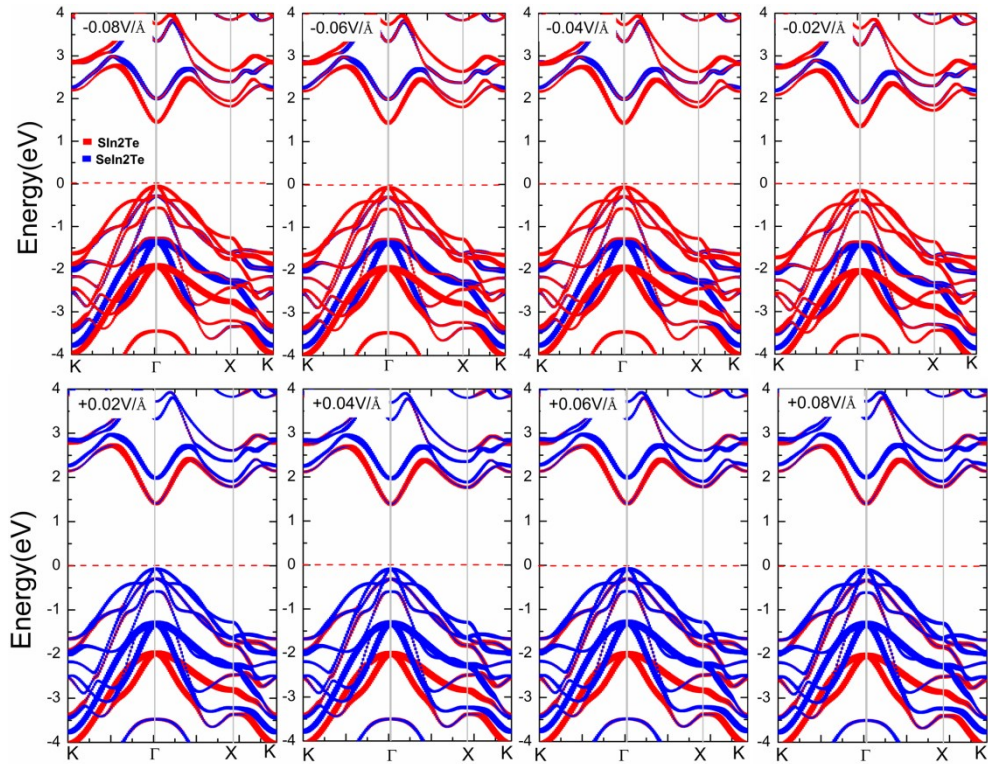

**Fig. S12** Projection band structure with vertical E-field from  $-0.08\text{V}/\text{\AA}$  to  $+0.08\text{V}/\text{\AA}$  with an interval of  $0.02\text{V}/\text{\AA}$ .

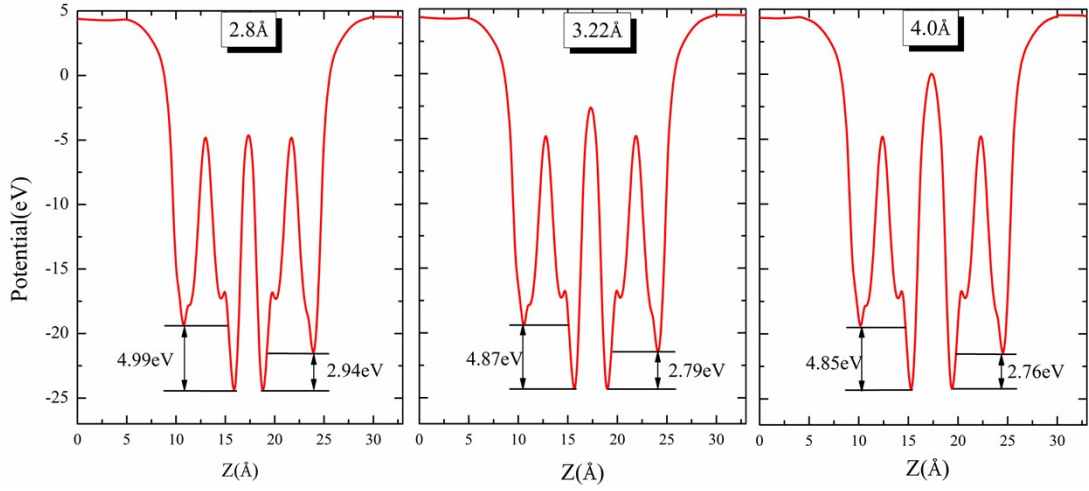

Fig. S13 Plane-averaged potential  $\bar{V}$  (red line) of Sn<sub>2</sub>Te/TeIn<sub>2</sub>Se vdW under specific interlayer distance.

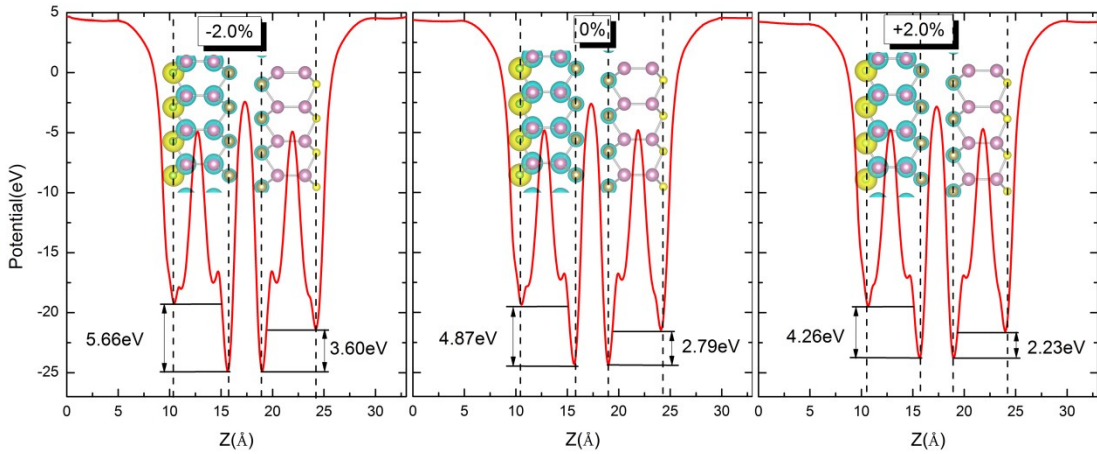

Fig. S14 Plane-averaged potential  $\bar{V}$  (red line) of Sn<sub>2</sub>Te/TeIn<sub>2</sub>Se vdW under specific in-plane strain. The inset represents the 3D isosurface of the differential electron density for the Sn<sub>2</sub>Te/TeIn<sub>2</sub>Se. The yellow and blue regions represent electron accumulation and depletion, respectively. The isosurface is  $0.03 |e|\text{\AA}^3$

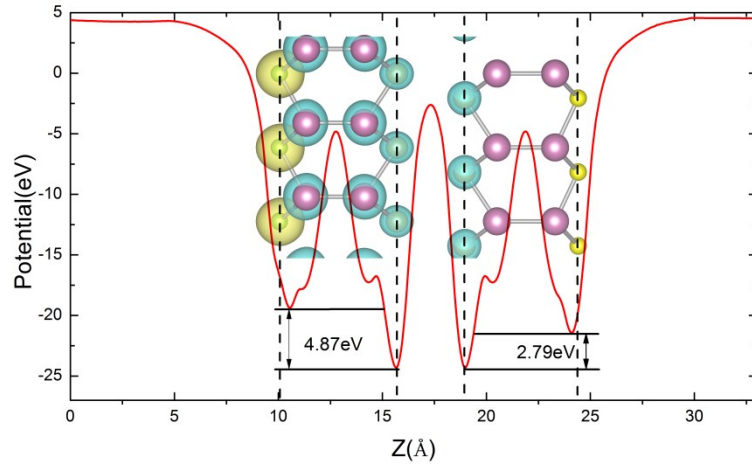

**Fig. S15** Plane-averaged potential  $\bar{V}$  (red line) for the Sn<sub>2</sub>Te/TeIn<sub>2</sub>Se. The inset represents the 3D isosurface of the differential electron density for the Sn<sub>2</sub>Te/TeIn<sub>2</sub>Se. The yellow and blue regions represent electron accumulation and depletion, respectively. The isosurface is  $0.03 |e|/\text{\AA}^3$

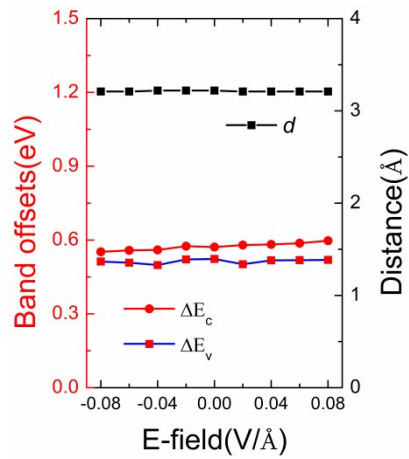

**Fig. S16** Evolution of interlayer distance  $d(\text{\AA})$  and band offsets of Sn<sub>2</sub>Te/TeIn<sub>2</sub>Se with increasing of the E-field.

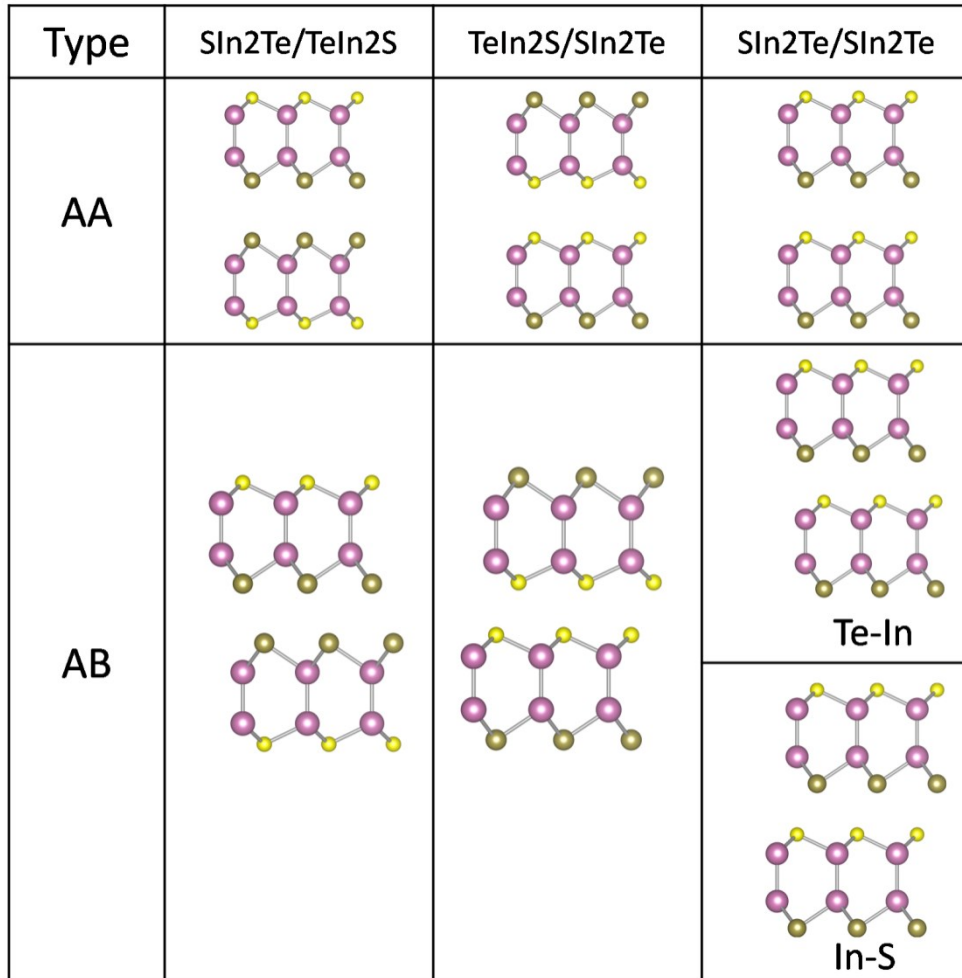

**Fig. S15** Various stacking configurations of  $\text{Sn}_2\text{Te}$  bilayer heterojunction.

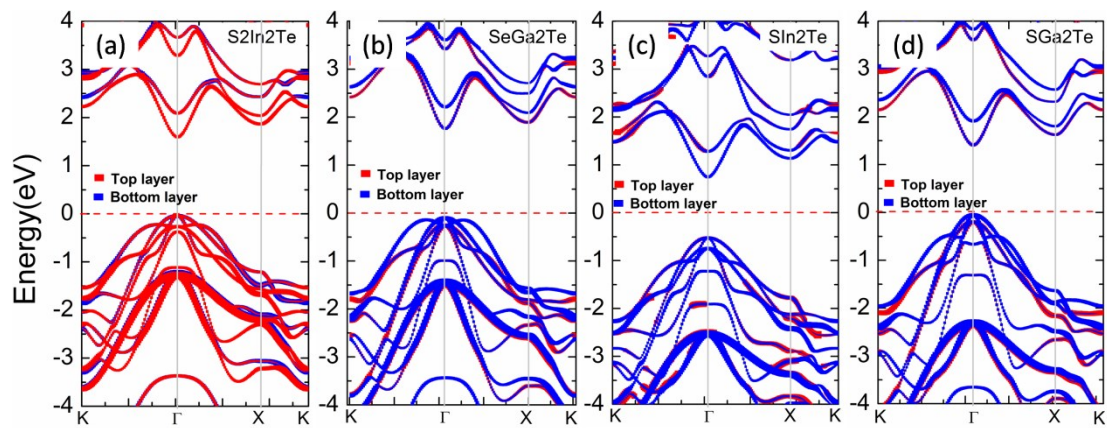

**Fig. S16** Projection band structures of the Janus bilayers (a)  $\text{SeIn}_2\text{Te}/\text{TeIn}_2\text{Se}$ , (b)  $\text{SeGa}_2\text{Te}/\text{TeGa}_2\text{Se}$ , (c)  $\text{Sn}_2\text{Te}/\text{TeIn}_2\text{S}$  and (d)  $\text{SGa}_2\text{Te}/\text{TeGa}_2\text{S}$ .

**Table S3** Binding energy ( $E_b$ ) of the different stacking configurations for the M2XTe bilayers heterojunction.

| System (Bilayers) | Stacking (type) | $E_b$ (eV) | System (Bilayers) | Stacking (type) | $E_b$ (eV) |
|-------------------|-----------------|------------|-------------------|-----------------|------------|
| TeGa2Se/TeGa2Te   | AA              | -0.1594    | TeIn2Se/TeIn2Se   | AA              | -0.1851    |
|                   | AB-Se-Ga        | -0.2602    |                   | AB-Se-In        | -0.3134    |
|                   | AB-Te-Ga        | -0.2553    |                   | AB-Te-In        | -0.3106    |
| SeGa2Te/TeGa2Se   | AA              | -0.1789    | SeIn2Te/TeIn2Se   | AA              | -0.2021    |
|                   | AB              | -0.2940    |                   | AB              | -0.3388    |
| TeGa2Se/SeGa2Te   | AA              | -0.1390    | TeIn2Se/SeIn2Te   | AA              | -0.1652    |
|                   | AB              | -0.2273    |                   | AB              | -0.2883    |
| TeIn2S/TeIn2S     | AA              | -0.1418    | TeGa2S/TeGa2S     | AA              | -0.1163    |
|                   | AB-S-In         | -0.2572    |                   | AB-S-Ga         | -0.2039    |
|                   | AB-Te-In        | -0.2536    |                   | AB-Te-Ga        | -0.1988    |
| SIn2Te/TeIn2Te    | AA              | -0.1754    | SGa2Te/TeGa2S     | AA              | -0.1540    |
|                   | AB              | -0.3101    |                   | AB              | -0.2680    |
| TeIn2S/SIn2Te     | AA              | -0.1039    | TeGa2S/SGa2Te     | AA              | -0.0809    |
|                   | AB              | -0.2202    |                   | AB              | -0.1537    |

**Table S4** In-Plane lattice constant  $a$ , Interlayer  $d$ (Å), bandgap  $E_g$  (eV), band alignment, band-gap type.

| Material (Bilayers) | $a$ (Å) | $d$ (Å) | $E_g$ (PBE) (eV) | $E_g$ (HSE06) (eV) | Band alignment | Type |
|---------------------|---------|---------|------------------|--------------------|----------------|------|
| SeIn2Te/TeIn2Se     | 4.099   | 3.21    | 0.94             | 1.63               | Type-I         | D    |
| SeGa2Te/TeGa2S      | 3.911   | 3.36    | 1.11             | 1.86               | Type-I         | D    |
| SIn2Te/TeIn2S       | 4.030   | 3.22    | 0.60             | 1.27               | Type-I         | D    |
| SGa2Te/TeGa2S       | 3.837   | 3.37    | 0.74             | 1.46               | Type-I         | D    |
